# Supplementary material for: Neoantigen-specific immunity in low mutation burden colorectal cancers of the consensus molecular subtype 4
Source: PubMed Central journal article supplement (PMC6938004; doi:10.1186/s13073-019-0697-8), 2019-12-30
Supplement: 13073_2019_697_MOESM5_ESM.pdf [file 13073_2019_697_MOESM5_ESM.pdf]

Fig. S1

■ Peptides    ■ SEB    □ DMSO

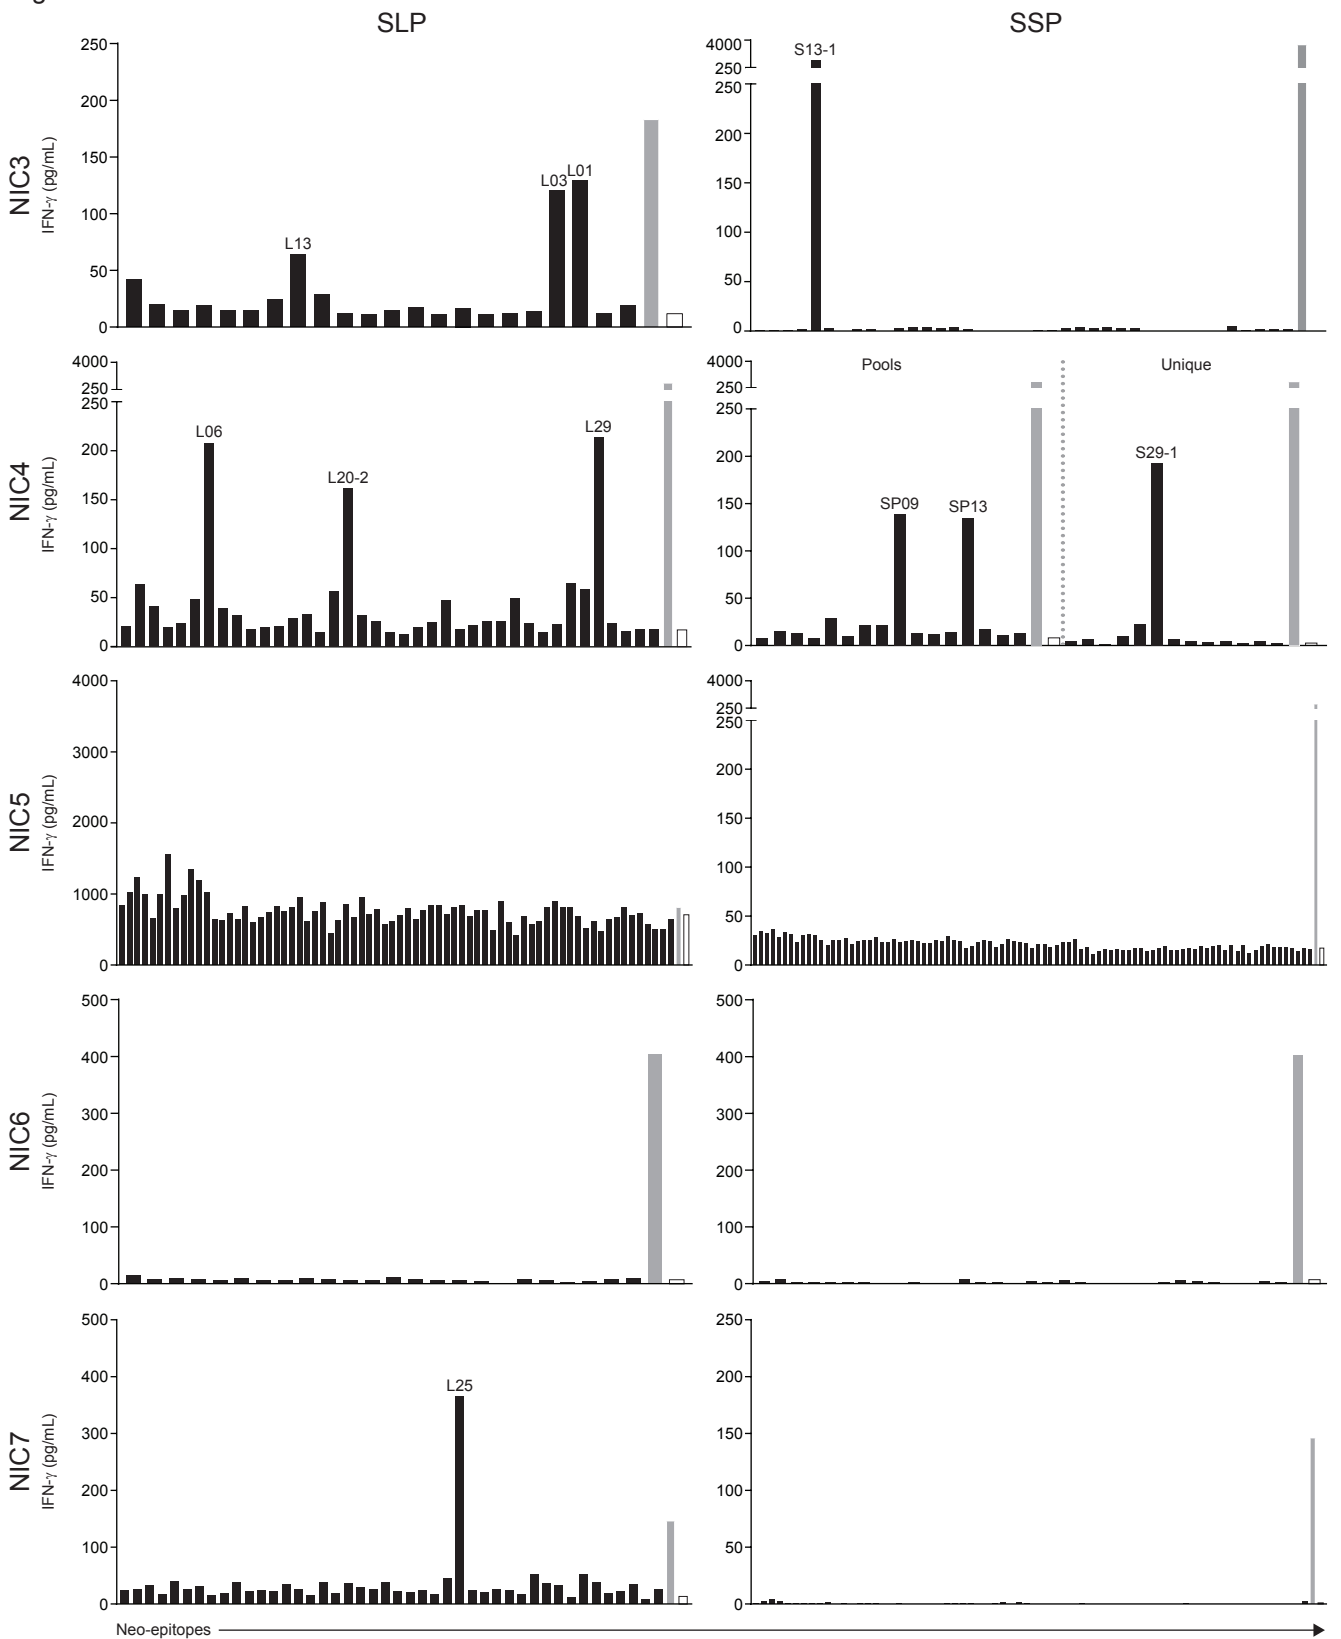

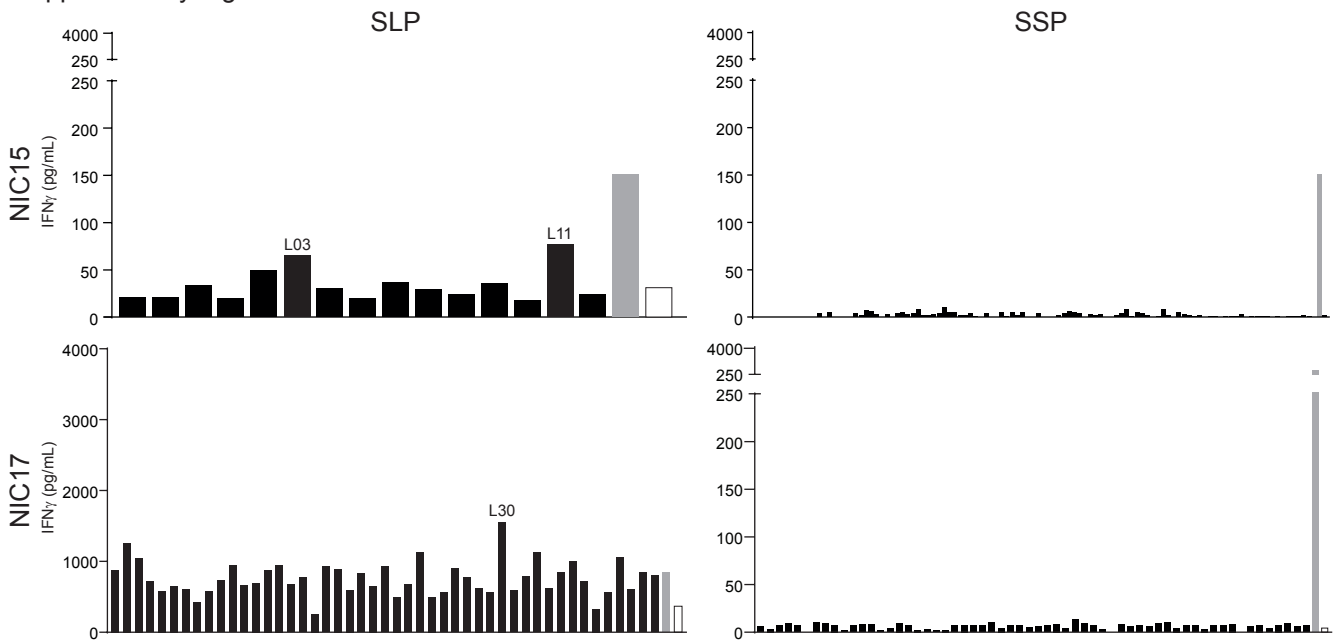

**Figure S1** | Neoantigen-specific reactivity screen of the expanded TIL from NIC3-7, NIC15 and NIC17 towards SLPs and SSPs. IFN- $\gamma$  production (y-axis) is shown for each neo-epitope that was tested (black bars, x-axis) and the positive (grey bar) and negative control (white bar). Peptide IDs are included for neo-epitope responses that were judged positive and selected for validation. SSPs and SLPs with the same ID number correspond to the same mutation per patient.
