# Supplementary material for: Neoantigen-specific immunity in low mutation burden colorectal cancers of the consensus molecular subtype 4
Source: PubMed Central journal article supplement (PMC6938004; doi:10.1186/s13073-019-0697-8), 2019-12-30
Supplement: 13073_2019_697_MOESM7_ESM.pdf [file 13073_2019_697_MOESM7_ESM.pdf]

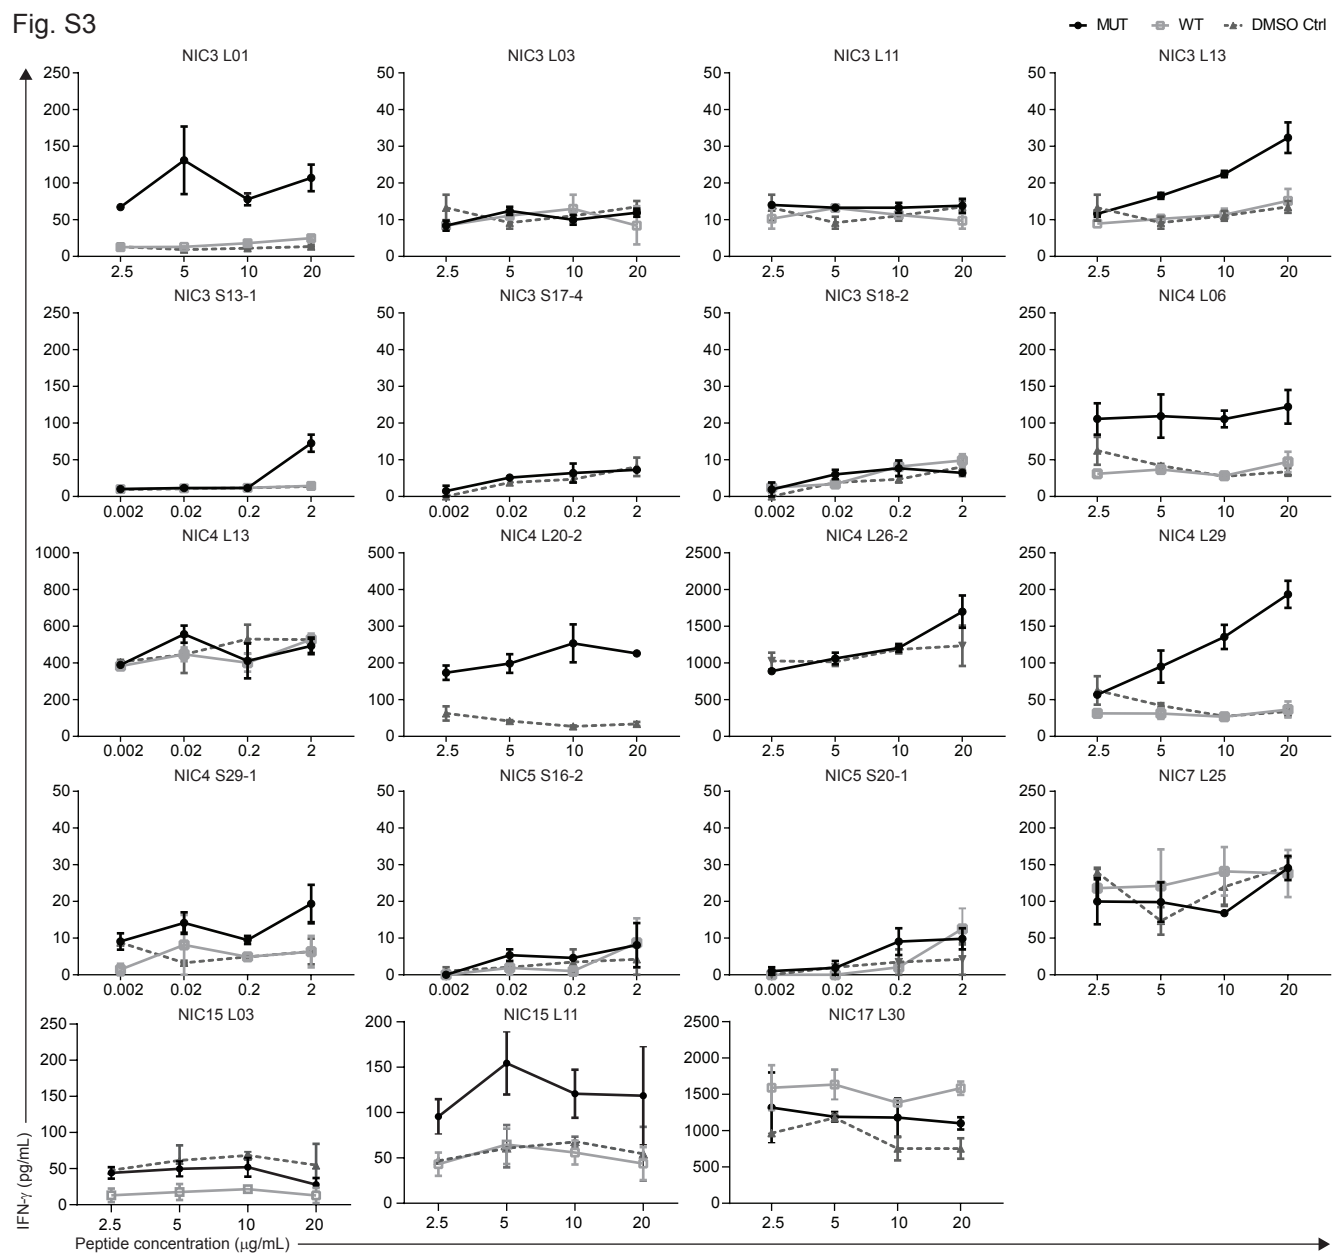

**Figure S3** | Validation of the neoantigen-specific responses detected in the first screen. IFN- $\gamma$  production of TIL and PBL from NIC3-7, NIC15 and NIC17 was measurement upon stimulation with mutant (black) and wild type (grey) HPLC peptides, and a DMSO control (dashed), at different peptide concentrations. The mean  $\pm$  standard deviation of the biological duplicates in the same experiment are depicted.
