# Supplementary material for: Neoantigen-specific immunity in low mutation burden colorectal cancers of the consensus molecular subtype 4
Source: PubMed Central journal article supplement (PMC6938004; doi:10.1186/s13073-019-0697-8), 2019-12-30
Supplement: 13073_2019_697_MOESM8_ESM.pdf [file 13073_2019_697_MOESM8_ESM.pdf]

**A**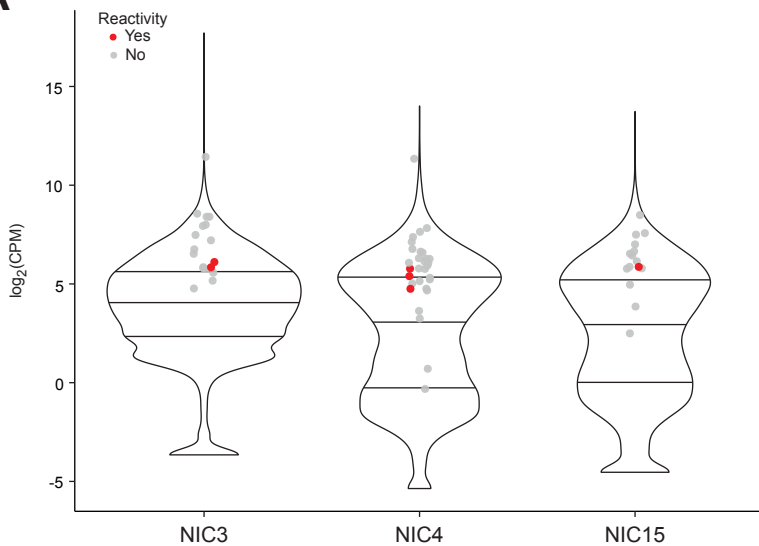**B**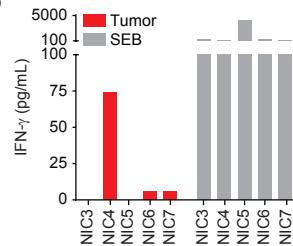**C**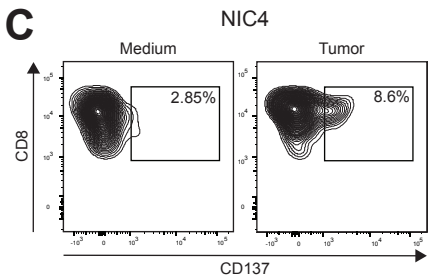

**Figure S4** | **a** RNA expression of genes encoding somatic mutations (dots) in relation to overall gene expression level in NIC3, NIC4, and NIC15. Red dots highlight the genes to which neoantigen-specific T cell responses were observed. **b** Measurement of IFN- $\gamma$  production upon co-culture of TIL with autologous tumor material (red) or SEB (positive control, grey). **c** Flow cytometric analysis of CD8+ TIL cultures derived from NIC4 shows an increase of CD137 expression upon co-culture with autologous tumor material compared to the medium control. The percentage in the gates refer to the CD137-positive fraction within the CD8+ subset.
